# Supplementary material
Source: PubMed Central journal article supplement (PMC4213120)
Supplement: supp_pp.114.246520_246520Supplemental_data.pdf [file supp_pp.114.246520_246520Supplemental_data.pdf]

**Title:** The role of OsHAK5 in potassium acquisition and transport from roots to shoots in rice at low potassium supply levels

**Authors:** Tianyuan Yang, Song Zhang, Yibing Hu, Fachi Wu, Qingdi Hu, Guang Chen, Jing Cai, Ting Wu, Nava Moran, Ling Yu, Guohua Xu

## SUPPLEMENTARY DATA

Table S1. The primers for Semi-quantitative RT-PCR and Real-time quantitative PCR of *OsHAK5*

| Gene<br>(DNA Accession No.)                     | Primers sequences ( 5' to 3' )       | Product<br>length (bp) |
|-------------------------------------------------|--------------------------------------|------------------------|
| <i>OsHAK5</i><br>(AK241580)                     | Semi-F: GGCATCCCACCCATACTTCCTCA      | 614                    |
|                                                 | Semi-R: TACGTCATTCTACCCGCAACAG       |                        |
|                                                 | Real-time-F: CATTGTGGACTATTTTGAAAGAA | 149                    |
|                                                 | Real-time-R: GGAGAACTACAGAAAAGCCAATC |                        |
| <i>OsACT</i><br>( <i>OsRac1</i> )<br>(AB047313) | Semi-F: GGAAGTGGTATGGTCAAGGC         | 750                    |
|                                                 | Semi-R: AGTCTCATGGATAACCGCAG         |                        |
|                                                 | Real-time-F: TTATGGTTGGGATGGGACA     | 197                    |
|                                                 | Real-time-R: AGCACGGCTTGAATAGCG      |                        |

Table S2. The primers for promoter of *OsHAK5*

| Gene(DNA<br>Accession No.)  | Primers sequences ( 5' to 3' )                                                             | Product<br>length (bp) |
|-----------------------------|--------------------------------------------------------------------------------------------|------------------------|
| <i>OsHAK5</i><br>(AK241580) | F: <u>GCGTTAATTA</u> ACCATAGTTGCCAGACTGTTAG<br>R: <u>AGTGGCGCGCC</u> TCTCAGTGTATGGAATTTGCT | 1776                   |

Notes: 5' spacer sequences are indicated in overstriking. The incorporated two restriction sites sequences of *Ascl*(TTAATTAA) and *PacI*(GGCGCGCC) are underlined.

Table S3. The primers for *OsHAK5*-cDNA for construction of overexpression

| Gene<br>(DNA Accession<br>No.) | Primers sequences ( 5' to 3' )                                                           | Product<br>length (bp) |
|--------------------------------|------------------------------------------------------------------------------------------|------------------------|
| <i>OsHAK5</i> (AK241580)       | F: <u>ATTGGTACCAT</u> GACCGAGCCTCTGCACAC<br>R: <u>ATAGCTAGCAG</u> ATTTC CAAGAACATCACCATC | 2346                   |

Notes: 5' spacer sequences are indicated in overstriking. Incorporated two restriction sites sequences of KpnI (GGTACC) and NheI (GCTAGC) are underlined.

Table S4. The primers for identification two homozygous mutant lines of *oshak5*

| Gene<br>(DNA Accession No.) | Primers sequences ( 5' to 3' )     |
|-----------------------------|------------------------------------|
| <i>OsHAK5</i><br>(AK241580) | DJ-3A09138 F: TGCATTTCTCACTCAGCAC  |
|                             | DJ-3A09138 R: GCAAGGATGGACATGATCTG |
|                             | HY-2A30318 F: TGGTTGCCTGAAGTTCTTCC |
|                             | HY-2A30318 R: GCCCAAATCTATCAGGCAAG |
| T-DNA Vector2715            | 2715L: ACGTCCGCAATGTGTTATTAA       |
|                             | 2715R: AACGCTGATCAATTCCACAG        |

**Figure S1**

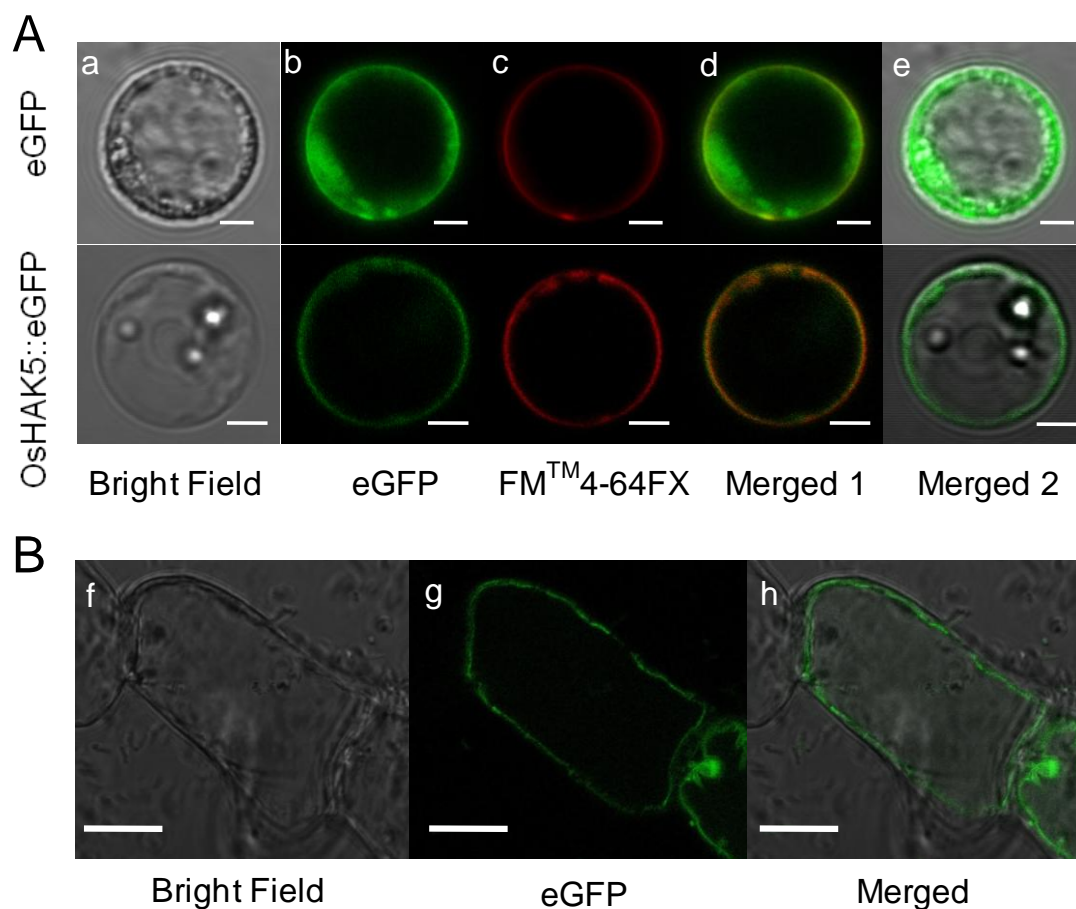

**Figure S1: Localization of OsHAK5 in the cell plasma membrane.**

**A**, An expression of eGFP and OsHAK5:eGFP fusion protein in rice protoplasts. Top row: images of a control protoplast expressing eGFP. Bottom row: images of a protoplast expressing OsHAK5:GFP fusion protein. (a) GFP (green) fluorescence images (excitation: 490 nm, emission: 525 nm). (b) Bright-field images. (c) FM4-64FX dye (red) images (FM4-64FX is a membrane-selective fluorescent vital dye; excitation: 543 nm, emission: 660 nm). (d) Superposition of the GFP and FM4-64FX fluorescence images. (e) Superposition of the GFP fluorescence and bright-field images. Bars = 5 μm.

**B**, An expression of OsHAK5:GFP fusion protein in BY-2 cells. (f) GFP images, (g) Bright-field images, (h) Overlap of GFP fluorescence and bright-field images. Tobacco (*Nicotianatabacum* L.) cv. Bright Yellow 2 (BY2) suspension-cultured cells were maintained in a modified liquid Linsmaier and Skoog (LS) medium (pH 5.8) (Nagata et al., 1981). The cells were cultivated in

this medium at 27°C in the dark on an orbital shaker at 125 rpm, according to Nakayama et al. (2000).

**Nagata T, Okada K, Takebe I, Matsui C** (1981) Delivery of tobacco mosaic-virus RNA into plant-protoplasts mediated by reverse-phase evaporation vesicles (Liposome). *Mol Gen Genet* **184**: 161-165.

**Nakayama H, Yoshida K, Ono H, Murooka Y, Shinmyo A** (2000) Ectoine, the compatible solute of *Halomonas elongata*, confers hyperosmotic tolerance in cultured tobacco cells. *Plant Physiol* **122**: 1239-1247.

**Figure S2**

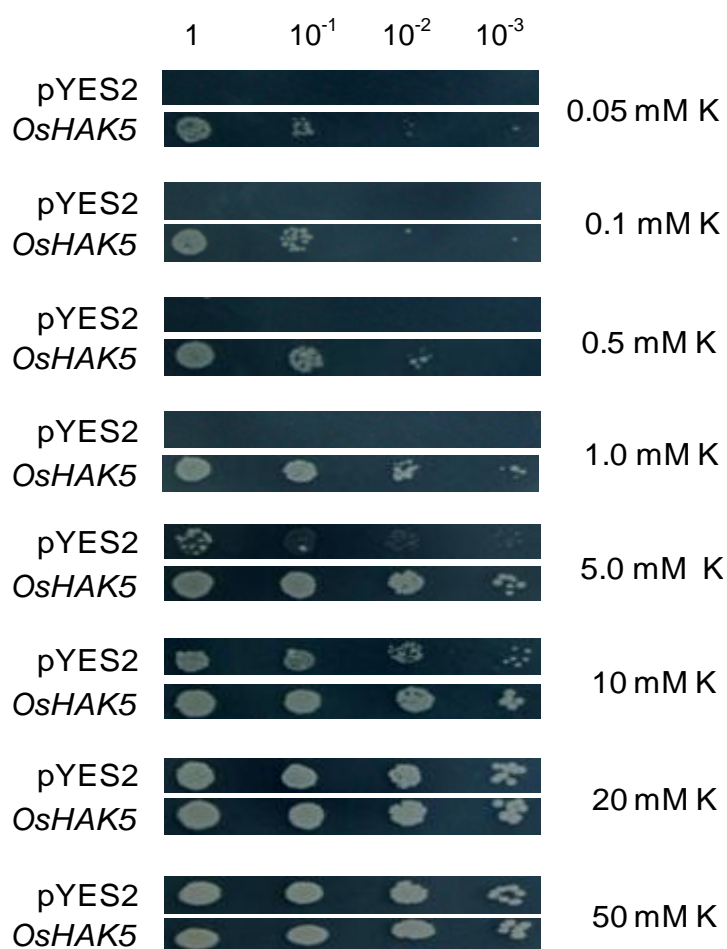

**Figure S2: Functional complementation test of *OsHAK5* in yeast for absorbing K from culture medium containing different levels of K.**

The coding sequence of *OsHAK5* was cloned in pYES2 (Invitrogen) under control of the inducible Gal1 promoter. The expression vectors were transformed into the R5421 strain, an K uptake-deficient strain of *Saccharomyces cerevisiae* [*ura3-52his3*Δ200 *leu2* Δ1 *trp1* Δ1 *ade2* *trk1* Δ::HIS3 *trk2* Δ::HIS3] (kindly provided by Prof. Gaber from Northwest university in USA). The transformants were selected on Glc-containing SC-agar plates without uracil, supplemented with 100 mM K. Phosphoric acid (AP) medium was used for subsequent growth assays which were performed as described previously (Horie *et al.*, 2011). The complementation tests were conducted on solid media, and the plates were incubated at 30 °C for 6 d. The numbers at the top indicate yeast culture dilutions.

**Figure S3**

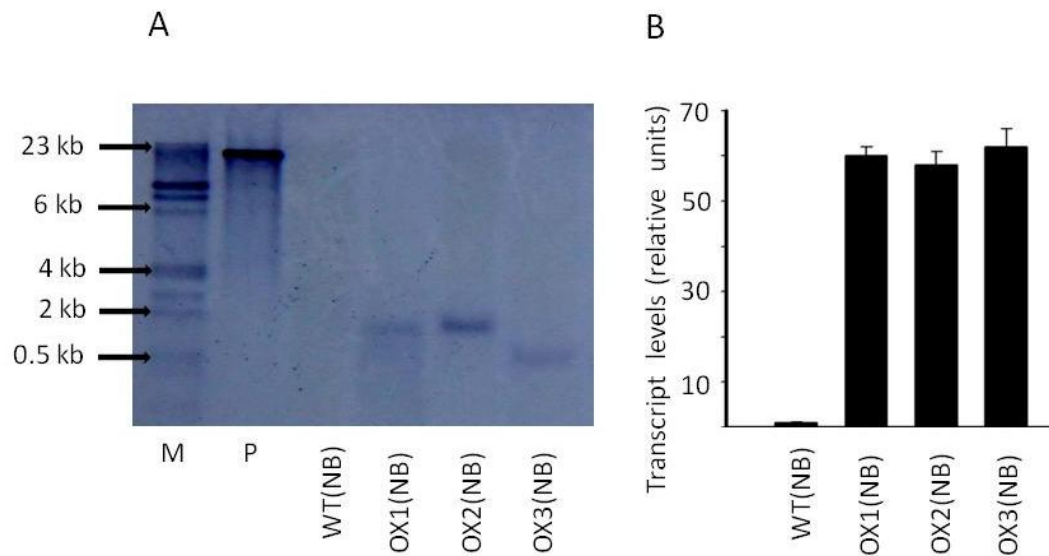

**FigureS3: Molecular identification of *OsHAK5*-overexpressing transgenic rice lines in the background of the Nipponbare cultivar.**

**A**, Southern blot analysis of the transgene copy number in T2 transgenic rice plants (OX1,OX2 and OX3)and WT plant. Genomic DNA was digested with two restriction enzymes *HindIII* and *EcoRI*, the Hygromycin gene was used as probe. The DNA was separated on 1%agarose gel. M: marker; P: pTK303-ubi as a positive control. **B**, Real-time quantitative RT-PCR analysis of endogenous *OsHAK5* gene levels in the leaves of WT, OX1, OX2 and OX3 plants using total RNA isolated from the leaves of two weeks-old seedlings.

Figure S4

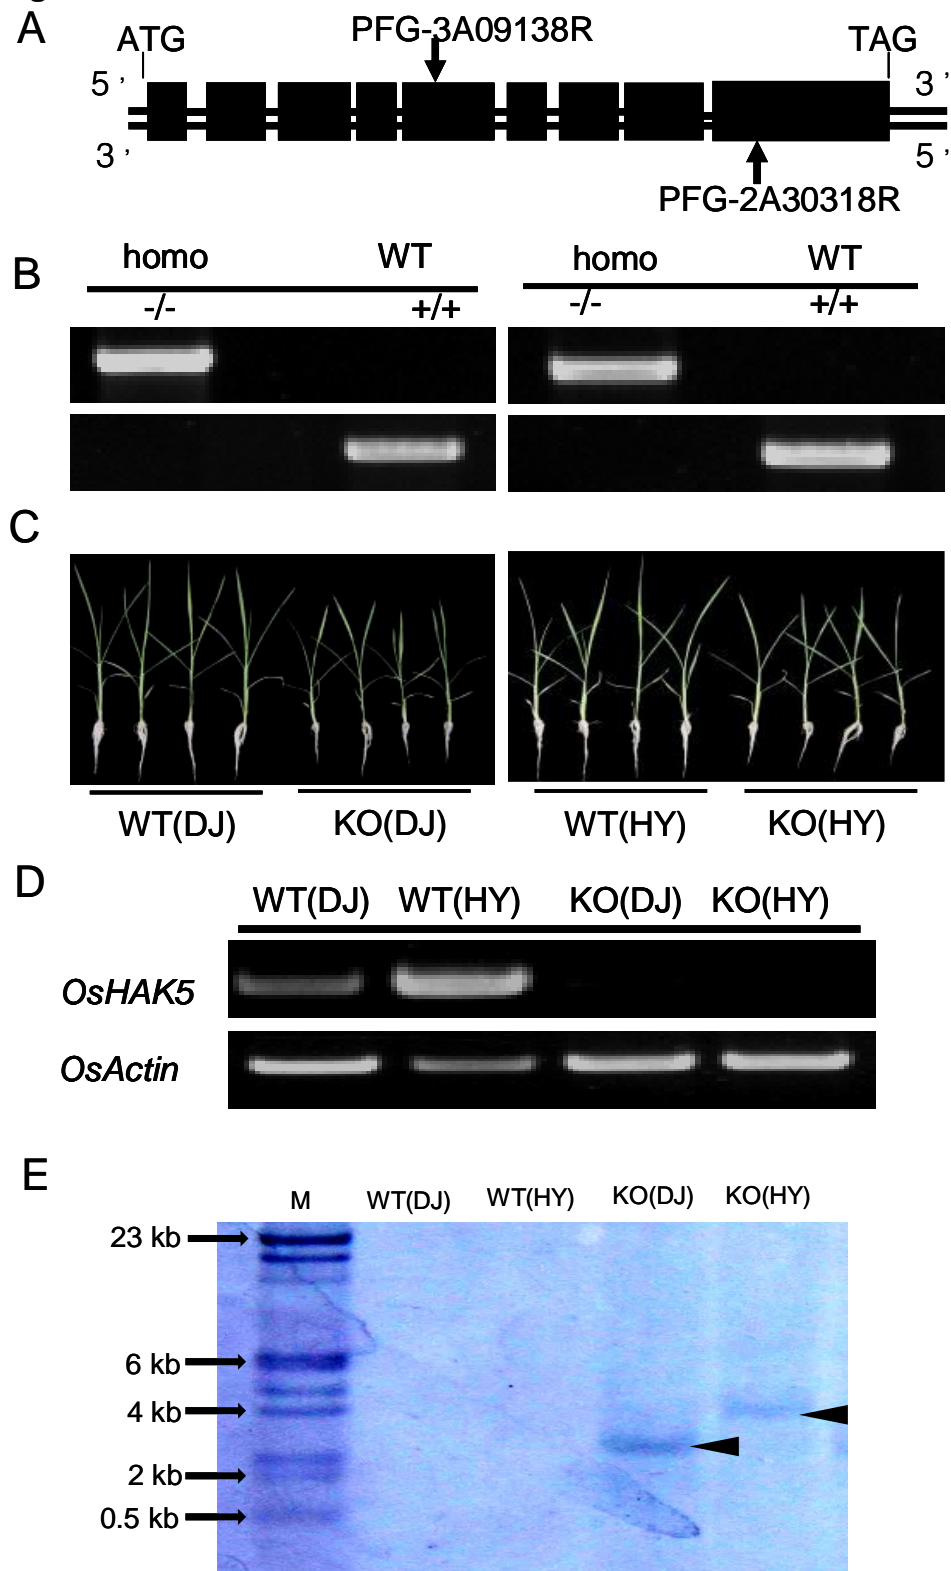

**Figure S4: Homozygous T-DNA insertion mutants of *OsHAK5* gene in rice: phenotype and isolation. A, The position of two T-DNA insertions, identified by sequencing the regions flanking the right border of the T-DNA inserts in the**

PCR products. **B**, Identification of plants homozygous (homo) for each of the T-DNA insert using two rounds of RT-PCR according to the detailed procedures for Japonica subspecies described in (<http://signal.salk.edu/cgi-bin/RiceGE>). All the primers are listed in the Supplemental Table S4. **C**, phenotype of 10-day-old seedlings of WTs and two homozygous T-DNA insertion (*oshak5* knockout mutant) lines grown in 0.3 mM K solution (KO(DJ) and KO(HY)). **D**, Expression levels of *OsHAK5* in leaves of WTs and *oshak5* mutants. RT-PCR was performed on total extracted RNA using the primers listed in Table S4. **E**, Southern blot analysis of WTs and the two T-DNA insertion lines. Genomic DNA from whole leaves was digested with two restriction enzymes *HindIII* and *EcoRI*, and separated by agarose gel of 1%. Arrow heads: indicated one copy insertion in the genomic DNA. M: marker; WTs: wild types of the Dongjin and Hwayoung cultivars. WT(DJ): wild type of the Dongjin cultivar, KO(DJ): *OsHAK5* knockout mutant line of the Dongjin cultivar. WT(HY): wild type of Hwayoung cultivar, KO(HY): *OsHAK5* knockout mutant line of the Hwayoung cultivar.



**Figure S5**

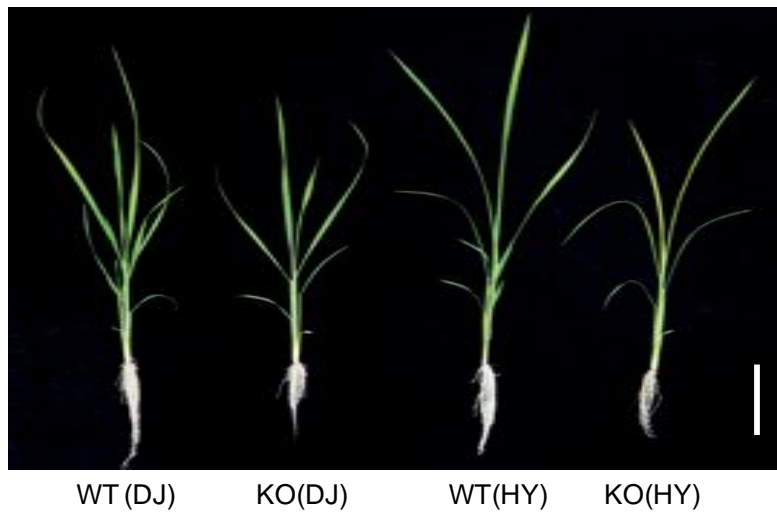

**Figure S5: Effect of *OsHAK5* knockout on rice growth at conditions of low K supply.** Phenotypes of WT and KO lines grown in IRRI solution containing 0.3 mM K for two weeks. Details of the treatment were described in Fig.4 legend. Bar is 5 cm.

**Figure S6**

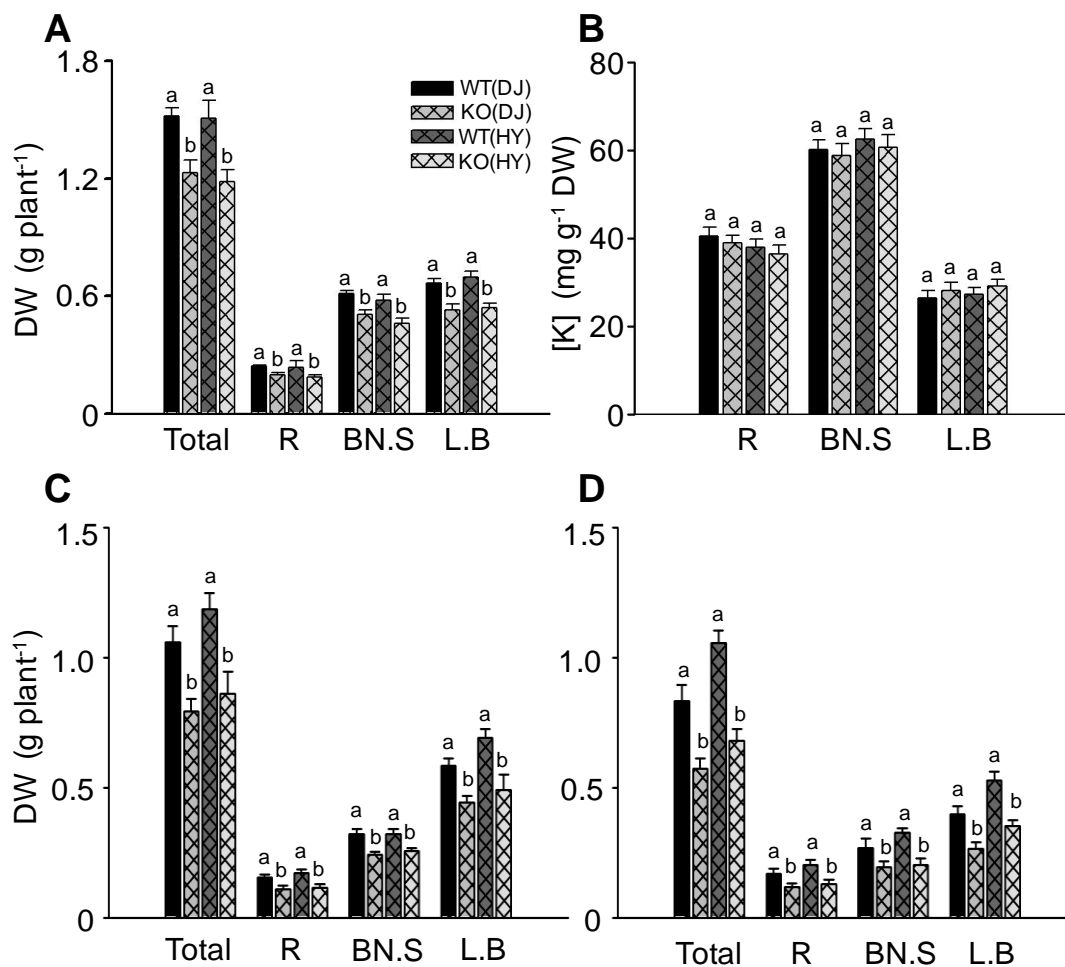

**Figure S6: Effect of continuous supply of high K on plant growth and K accumulation of the *OshAK5* knockout transgenic rice. A and B:** Ten-day-old seedlings were grown continuously in IRRI solution containing 1 mM K for two weeks, and then supplied with 5 mM K for two more weeks. **C and D:** Independent experiment for growth comparison of WT and the *oshak5* mutants which were grown continuously in IRRI solution containing 1 mM K for one week, and then supplied with 10 mM K (**C**) and 20 mM K (**D**) for two more weeks. WT(DJ): wild type of the Dongjin cultivar, KO(DJ): *OshAK5* knockout mutant line of the Dongjin cultivar. WT(HY): wild type of the Hwayoung cultivar, KO(HY): *OshAK5* knockout mutant line of the Hwayoung cultivar, error bars: se ( $n=5$  plants), DW: Dry Weight. Significant differences from WT in each group are indicated by different letters ( $P<0.05$ , one way ANOVA). R: root, BN.S: basal node + sheath, L.B: leaf blade.

**Figure S7**

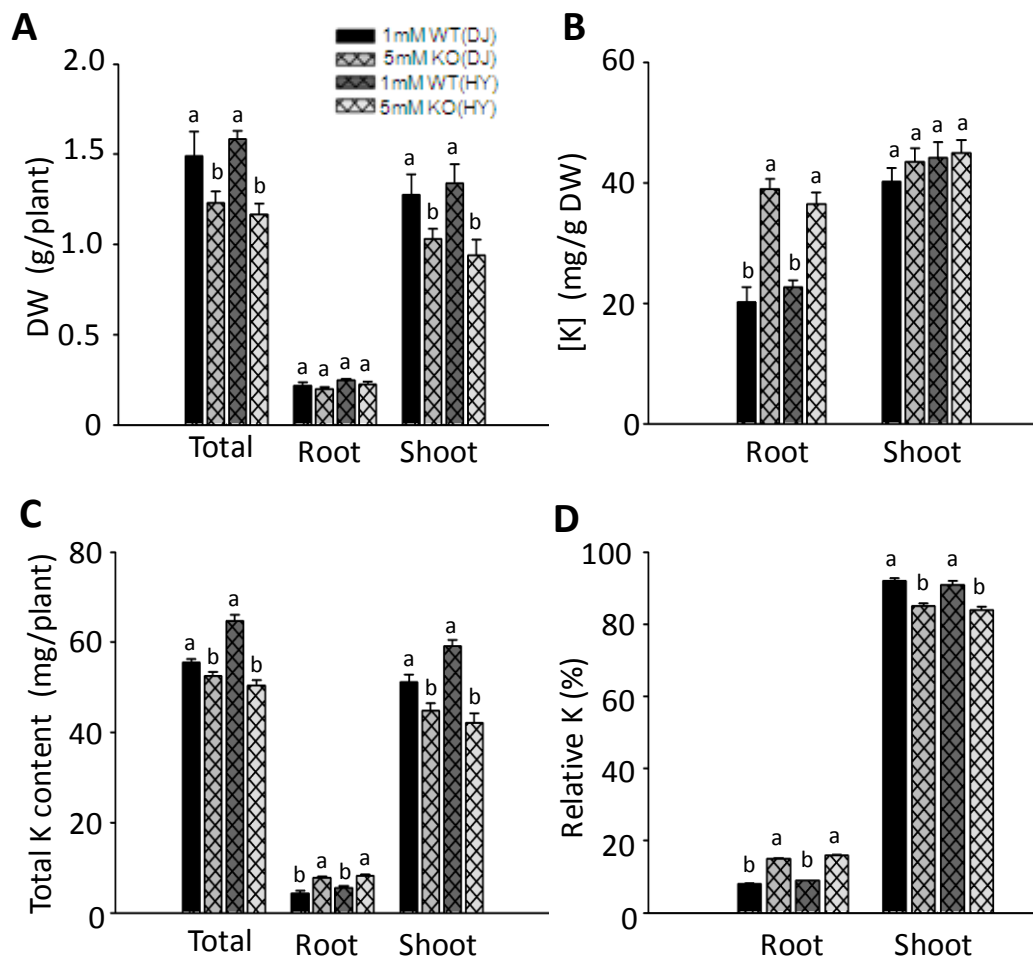

**Figure S7: Effect of *OsHAK5* on K partitioning between root and shoot of the rice plants with similar root size and total K contents.** WT plants were grown in 1 mM K and KO plants in 5 mM K solution. **A** and **B**: Dry biomass and K concentration of WT and KO of DJ and HYc cultivars; WT data (plants in 1 mM K) are from Figs. 7 B&D and KO data (plants in 5 mM K) are from Figs. S6A&B, re-plotted here with the biomass of basal node and sheath and leaf blade merged into shoot biomass. **C**, Total K content per plant. **D**, Relative amount of total K distributed between roots and shoots of WT and KO plants.

**Figure S8**

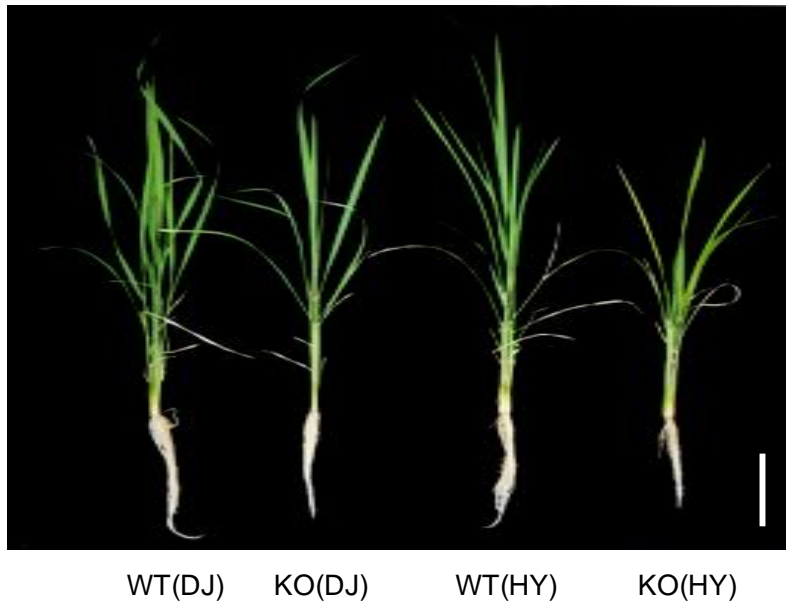

**Figure S8: Effect of *OsHAK5* knockout on plant growth in the presence of 100 mM NaCl.** Phenotypes of WT and KO lines grown in IRRI solution containing 1 mM K and 100 mM NaCl. Details of the treatment were described in Fig.10 legend. Bar is 5 cm.
